# Supplementary material for: Effects of crystalline subunit size on silk fiber mechanics
Source: Royal Society of Chemistry journal article supplement (doi:10.1039/c1sm05470h), 2011-01-01

## SUPPORTING MATERIAL

### EFFECTS OF CRYSTALLINE SUBUNIT SIZE ON SILK FIBER MECHANICS

Murat Cetinkaya, Senbo Xiao, Frauke Gräter

### SUPPORTING FIGURE LEGENDS

**Supporting Fig. S1.** A comparison of the all-atom and skeleton models. The increase in the axial elastic modulus with respect to the backbone length,  $N$  is shown. Smooth lines are spline fits to the data points.

**Supporting Fig. S2.** Rupture properties of the crystalline subunits obtained from MD simulations. (a) The variation of the rupture stress and strain with respect to (a) the number of layers in a crystal,  $S$ , and (b) the backbone length,  $N$ . Smooth lines in (a) and (b) are spline fits to the data points.

## SUPPORTING FIGURES

S1.

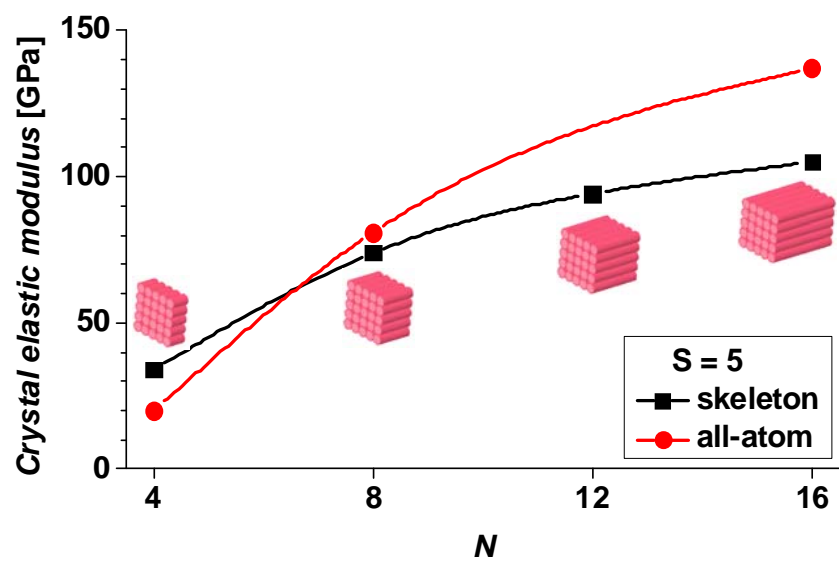

S2.

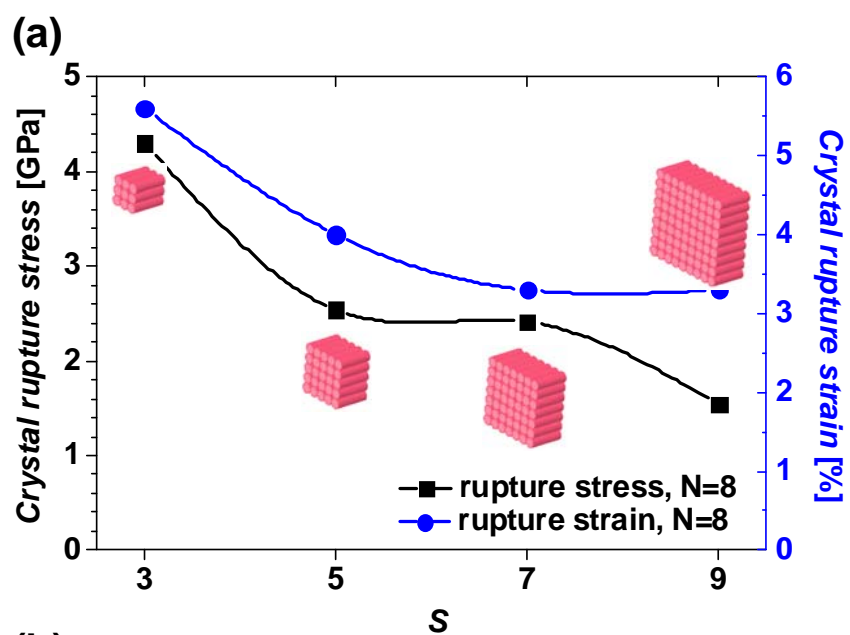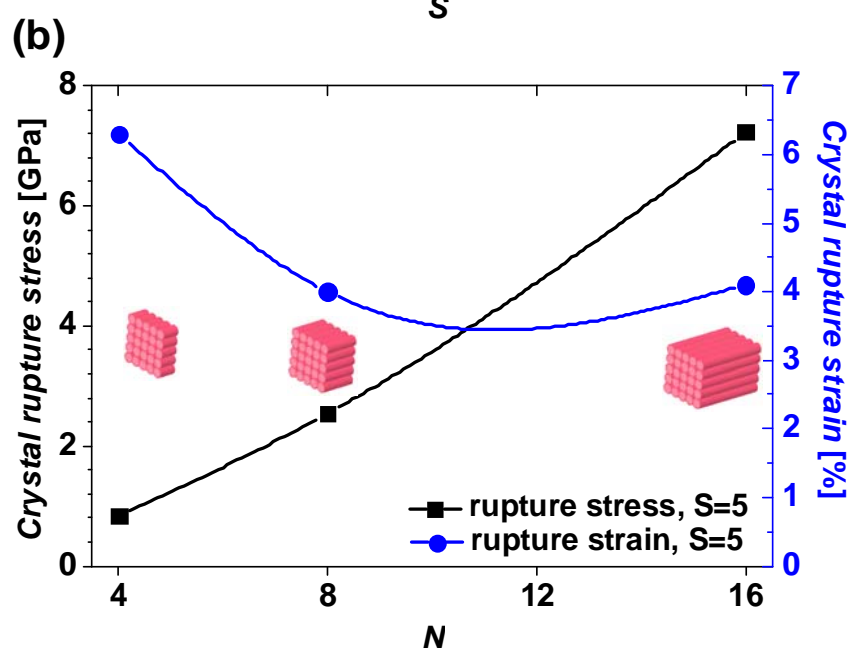

Supplement: c1sm05470h.pdf [file c1sm05470h.pdf]
